# Supplementary material for: Hierarchical urchin-like Co9S8@Ni(OH)2 heterostructures with superior electrochemical performance for hybrid supercapacitors
Source: Royal Society of Chemistry journal article supplement (doi:10.1039/c9nj01255a), 2019-01-01
Supplement: c9nj01255a1.pdf [file c9nj01255a1.pdf]

*Supplementary Information for*

**Hierarchical urchin-like Co<sub>9</sub>S<sub>8</sub>@Ni(OH)<sub>2</sub> heterostructures  
with superior electrochemical performance for hybrid  
supercapacitor**

Qing Xu, Ping Xia, Yuyan Xu, Deli Jiang, and Min Chen\*

*School of Chemistry and Chemical Engineering, Jiangsu University, Zhenjiang*

*212013, China*

Corresponding author: Min Chen

E-mail address: *chenmin3226@sina.com*

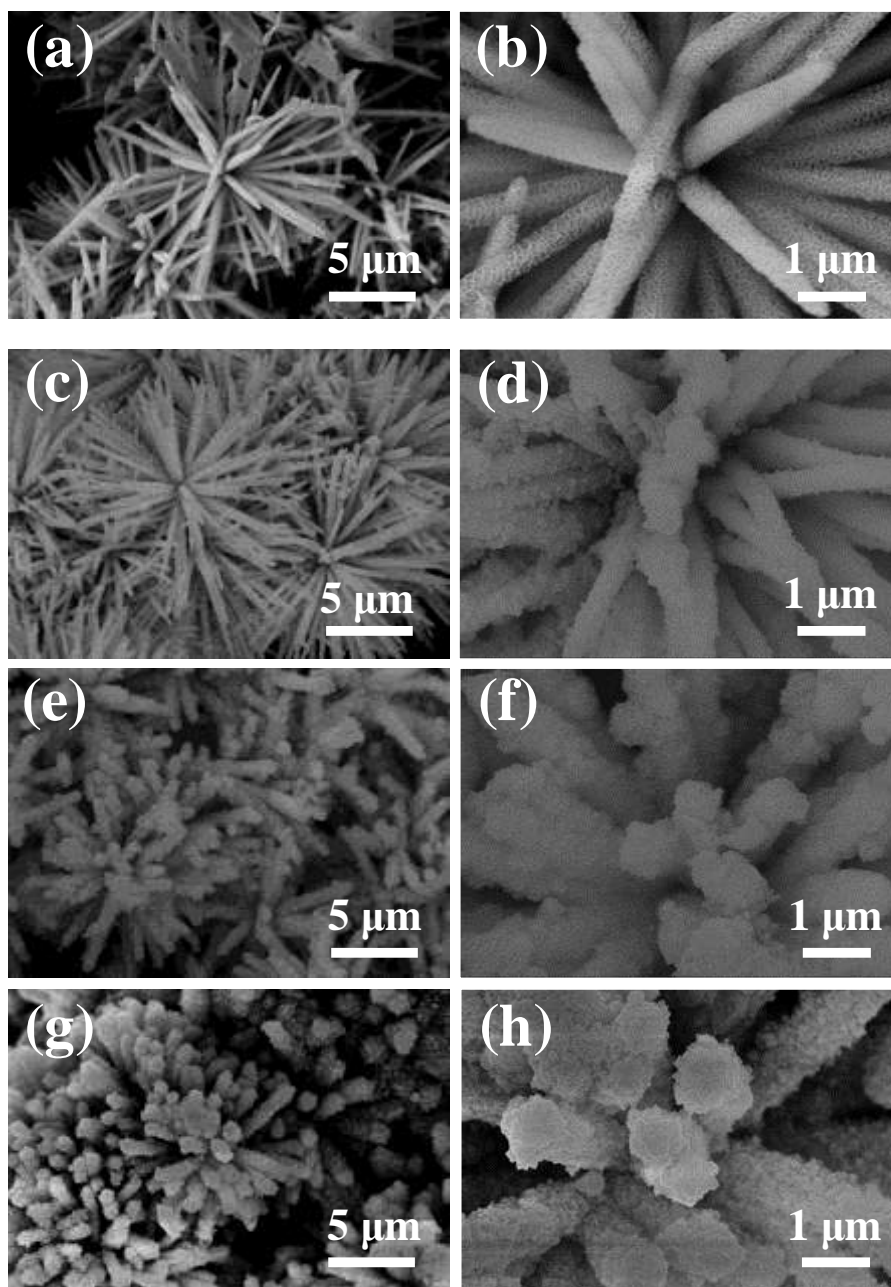

**Fig. S1** SEM images of (a,b)  $\text{Co}_9\text{S}_8@\text{Ni}(\text{OH})_2\text{-100S}$ , (c,d)  $\text{Co}_9\text{S}_8@\text{Ni}(\text{OH})_2\text{-200S}$ , (e,f)  $\text{Co}_9\text{S}_8@\text{Ni}(\text{OH})_2\text{-600S}$ , and (g,h)  $\text{Co}_9\text{S}_8@\text{Ni}(\text{OH})_2\text{-800S}$ .

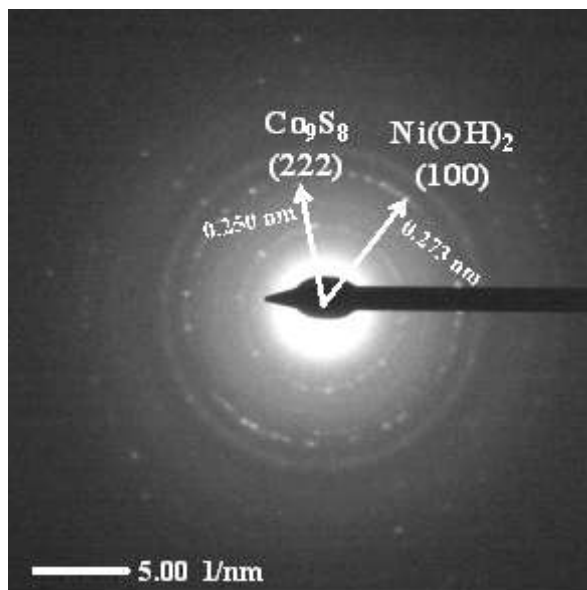

**Fig. S2** Selected area electron diffraction pattern (SAED) of the  $\text{Co}_9\text{S}_8@\text{Ni}(\text{OH})_2\text{-400S}$  sample.

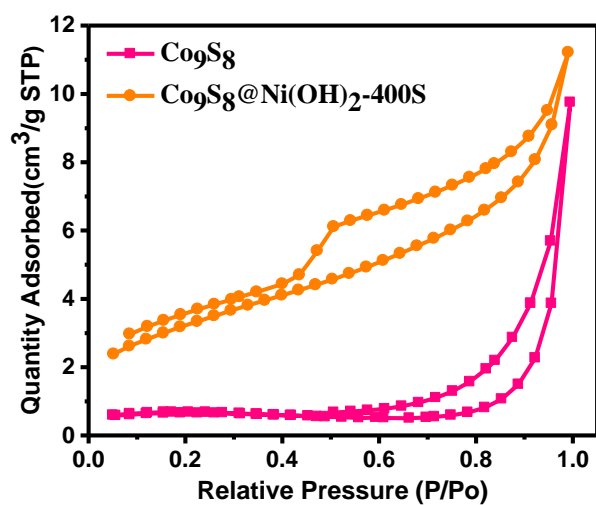

**Fig. S3** Nitrogen absorption-desorption isotherms of  $\text{Co}_9\text{S}_8$  and  $\text{Co}_9\text{S}_8@\text{Ni}(\text{OH})_2\text{-400S}$ .

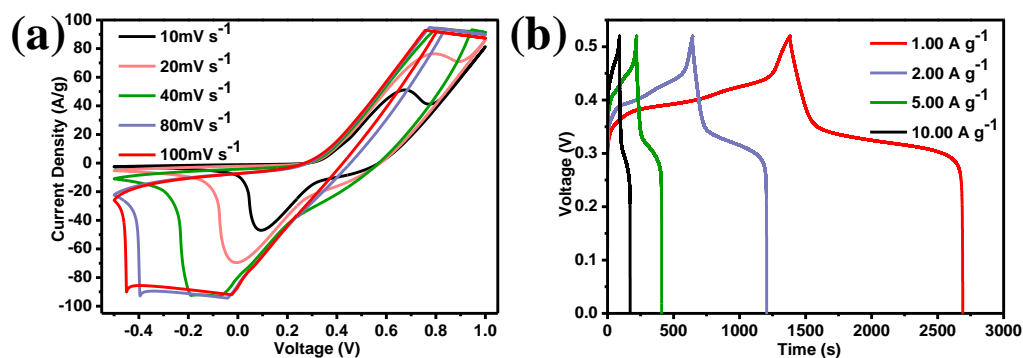

**Fig. S4** (a) CV curves of the  $\text{Co}_9\text{S}_8\text{-Ni(OH)}_2\text{-400S}$  at various scan rates; (b) charge and discharge curves of the  $\text{Co}_9\text{S}_8\text{-Ni(OH)}_2\text{-400S}$  at different current densities.

**Table S1** Comparison studies for metal sulfide, hydroxide and their SC performances.

| Electrocatalysts                                           | Electrolyte (KOH) | Mass loading ( $\text{mg cm}^{-2}$ ) | Power density ( $\text{W kg}^{-1}$ ) | Energy density ( $\text{W h kg}^{-1}$ ) | Reference                                     |
|------------------------------------------------------------|-------------------|--------------------------------------|--------------------------------------|-----------------------------------------|-----------------------------------------------|
| $\text{Co}_9\text{S}_8$                                    | 3M                | 1.9                                  | 800                                  | 15                                      | <i>New J. Chem.</i> 2017, 41, 1142-1148       |
| $\text{NiCo}_2\text{S}_4/\text{Co}_9\text{S}_8$            | 3M                | 3.5                                  | 800                                  | 42                                      | <i>Appl. Surf. Sci.</i> 2018, 434, 861-870    |
| $\text{Co}_9\text{S}_8/\alpha\text{-MnS}@N\text{-C}@MoS_2$ | 2M                | /                                    | 729                                  | 64                                      | <i>Small</i> , 2018, 1800291.                 |
| $\text{Co}_9\text{S}_8\text{-NSA/NF}$                      | 1M                | 2.8                                  | 828                                  | 20                                      | <i>Nanoscale</i> , 2018, 10, 2735             |
| $\text{CoMoO}_4/\text{Co}_9\text{S}_8$                     | 3M                | 4.5                                  | 800                                  | 38                                      | <i>Electrochim. Acta</i> , 2017, 252, 470-481 |
| $\text{Co}_9\text{S}_8@\text{Ni(OH)}_2/\text{CF}$          | 6M                | 2                                    | 253                                  | 31                                      | <i>J. Mater. Chem. A</i> , 2017, 5, 22782     |
| $\text{Ni}_3\text{S}_2@\text{CoS}$                         | 2M                | 13                                   | 800                                  | 16                                      | <i>J. Name.</i> 2013, 00, 1-3                 |
| $\text{NiCo}_2\text{S}_4@\text{Ni(OH)}_2$                  | 2M                | 2.8                                  | 6420                                 | 32                                      | <i>Electrochim. Acta</i> , 2016, 193, 116-127 |
| $\text{Co}_3\text{O}_4@\text{Ni(OH)}_2$                    | 3M                | 4.5                                  | 347                                  | 40                                      | <i>Chem. Eng. J.</i> 2017, 315, 35-45         |
| $\text{NiCo}_2\text{S}_4@\text{Ni(OH)}_2@\text{PPy}$       | 2M                | 3.2                                  | 800                                  | 16                                      | <i>J. Mater. Chem. A</i> , 2018, 6, 2482      |
| $\text{Ni(OH)}_2/3D\text{-Ni}$                             | 1M                | /                                    | 500                                  | 40                                      | <i>Nano Energy</i> 2017, 39, 639-646          |
| $\text{Co}_9\text{S}_8\text{-Ni(OH)}_2/\text{NF}$          | 2M                | 4.5                                  | 800                                  | 48                                      | <b>This work</b>                              |
